# Supplementary material for: DEmiRNA-mRNA regulatory network reveals miR‐122-5p as a regulatory factor of arginine metabolism in necrotizing enterocolitis
Source: Front Genet. 2025 Jan 22;15:1480431. doi: 10.3389/fgene.2024.1480431 (PMC11794208; doi:10.3389/fgene.2024.1480431)
Supplement: Supplementary file 2 [file Table3.xlsx]

## Sheet: Sheet1
Primer name	Sequence (5′-3′)
MiR-150-5p-F	GCGTCTCCCAACCCTTGTA
MiR-150-5p-R	AGTGCAGGGTCCGAGGTATT
MiR-150-5p-RT	GTCGTATCCAGTGCAGGGTCCGAGGTATTCGCACTGGATACGACCACTGG
MiR-122-5p-F	CGCGTGGAGTGTGACAATGG
MiR-122-5p-R	AGTGCAGGGTCCGAGGTATT
MiR-122-5p-RT	GTCGTATCCAGTGCAGGGTCCGAGGTATTCGCACTGGATACGACCAAACA
MiR-1843a-3p-F	CGCGTCTGATCGTTCACCTC
MiR-1843a-3p-R	AGTGCAGGGTCCGAGGTATT
MiR-1843a-3p-F	GTCGTATCCAGTGCAGGGTCCGAGGTATTCGCACTGGATA
MiR-195a-5p-F	GCGCGTAGCAGCACAGAAAT
MiR-195a-5p-R	AGTGCAGGGTCCGAGGTATT
MiR-195a-5p-RT	GTCGTATCCAGTGCAGGGTCCGAGGTATTCGCACTGGATACGACGCCAAT
MiR-497a-5p-F	CGCAGCAGCACACTGTGG
MiR-497a-5p-R	AGTGCAGGGTCCGAGGTATT
MiR-497a-5p-RT	GTCGTATCCAGTGCAGGGTCCGAGGTATTCGCACTGGATACGACTACAAA
MiR-326-3p-F	CGCCTCTGGGCCCTTCC
MiR-326-3p-R	AGTGCAGGGTCCGAGGTATT
MiR-326-3p-RT	GTCGTATCCAGTGCAGGGTCCGAGGTATTCGCACTGGATACGACACTGGA
MiR-434-5p-F	GCGGCTCGACTCATGGTTT
MiR-434-5p-R	AGTGCAGGGTCCGAGGTATT
MiR-434-5p-RT	GTCGTATCCAGTGCAGGGTCCGAGGTATTCGCACTGGATACGACTGGTTC
MiR-369-5p-F	CGCGAGATCGACCGTGTTAT
MiR-369-5p-R	AGTGCAGGGTCCGAGGTATT
MiR-369-5p-RT	GTCGTATCCAGTGCAGGGTCCGAGGTATTCGCACTGGATACGACGCGAAT
MiR-592-5p-F	CGCGATTGTGTCAATATGCGA
MiR-592-5p-R	AGTGCAGGGTCCGAGGTATT
MiR-592-5p-RT	GTCGTATCCAGTGCAGGGTCCGAGGTATTCGCACTGGATACGACACATCA
MiR-27a-5p-F	GCGAGGGCTTAGCTGCTTG
MiR-27a-5p-R	AGTGCAGGGTCCGAGGTATT
MiR-27a-5p-RT	GTCGTATCCAGTGCAGGGTCCGAGGTATTCGCACTGGATACGACTGCTCA
MiR-122b-3p-F	CGCGAAACACCATTGTCACA
MiR-122b-3p-R	AGTGCAGGGTCCGAGGTATT
MiR-122b-3p-RT	GTCGTATCCAGTGCAGGGTCCGAGGTATTCGCACTGGATACGACGTGGAG
MiR-5099-F	GCGCGTTAGATCGATGTGG
MiR-5099-R	AGTGCAGGGTCCGAGGTATT
MiR-5099-RT	GTCGTATCCAGTGCAGGGTCCGAGGTATTCGCACTGGATACGACGGAGCA
MiR-301b-5p-F	GCGGCTCTGACTAGGTTGC
MiR-301b-5p-R	AGTGCAGGGTCCGAGGTATT
MiR-301b-5p-RT	GTCGTATCCAGTGCAGGGTCCGAGGTATTCGCACTGGATACGACAGTAGT
MiR-493-3p-F	CGCGTGAAGGTCCTACTGTGT
MiR-493-3p-R	AGTGCAGGGTCCGAGGTATT
MiR-493-3p-RT	GTCGTATCCAGTGCAGGGTCCGAGGTATTCGCACTGGATACGACCCTGGC
MiR-30a-3p-F	GCGCTTTCAGTCGGATGTT
MiR-30a-3p-R	AGTGCAGGGTCCGAGGTATT
MiR-30a-3p-RT	GTCGTATCCAGTGCAGGGTCCGAGGTATTCGCACTGGATACGACGCTGCA
U6-F	AGAGAAGATTAGCATGGCCCCTG
U6-R	ATCCAGTGCAGGGTCCGAGG
U6-RT	GTCGTATCCAGTGCAGGGTCCGAGGTATTCGCACTGGATACGACAAAATA
PRODH2-F	GGTCACTCATGGACTAGCGTTTCAG
PRODH2-R	TTCCTCACTTCCTCTGCTGTCTCC
ALDH18A1-F	AACCGACCTCTTGATTGTCCTC
ALDH18A1-R	CCAGAGGGCGGCTTTCA
β-Actin-F	AAGATCAAGATCATTGCTCCTCC
β-Actin-R	GACTCATCGTACTCCTGCTTGC
